# Supplementary material for: Stapled BH3 Peptides against MCL-1: Mechanism and Design Using Atomistic Simulations
Source: PubMed Central journal article supplement (PMC3432064; doi:10.1371/journal.pone.0043985), 2012-08-31

Figure S11 A

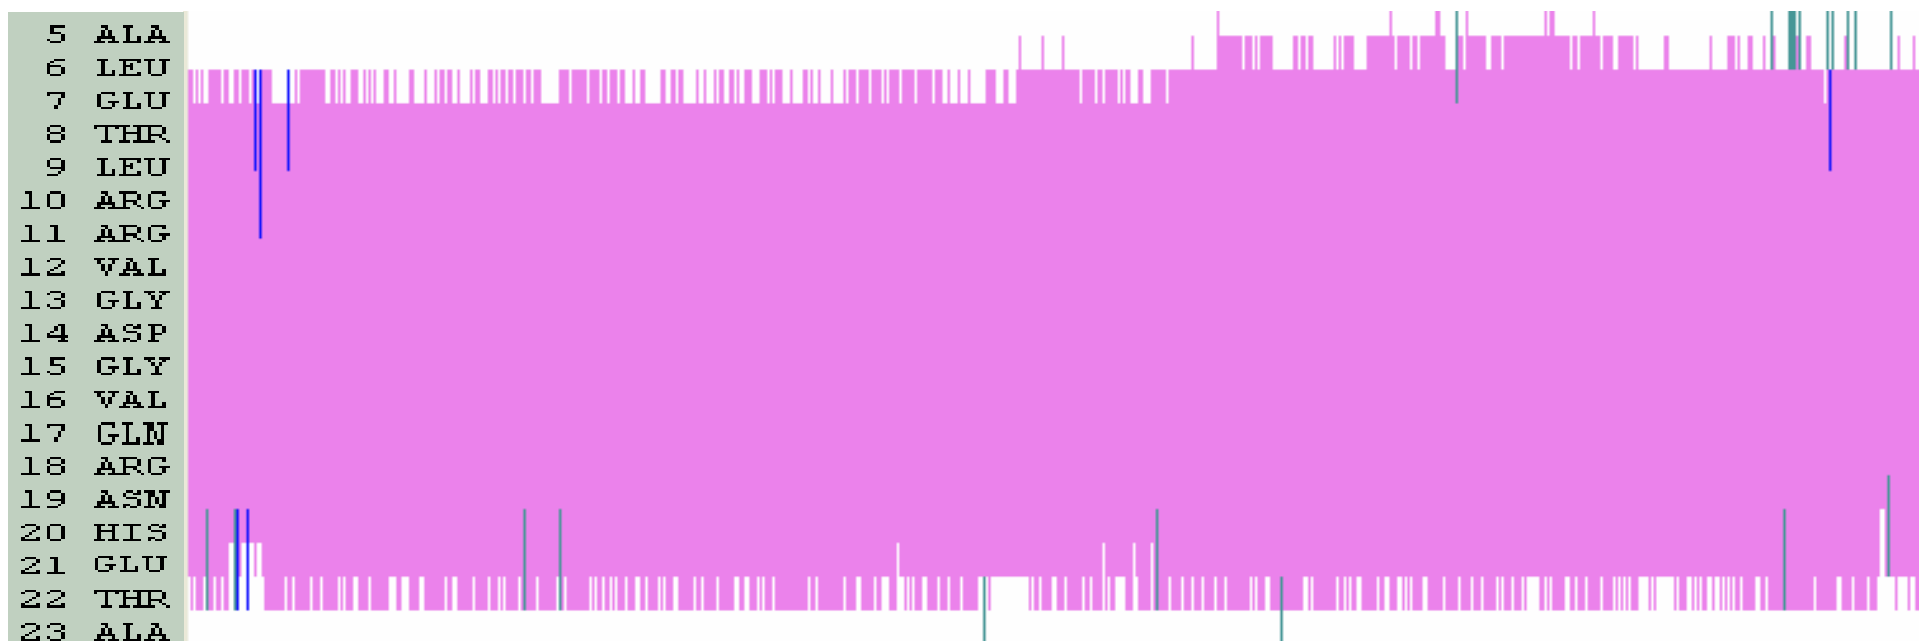

B

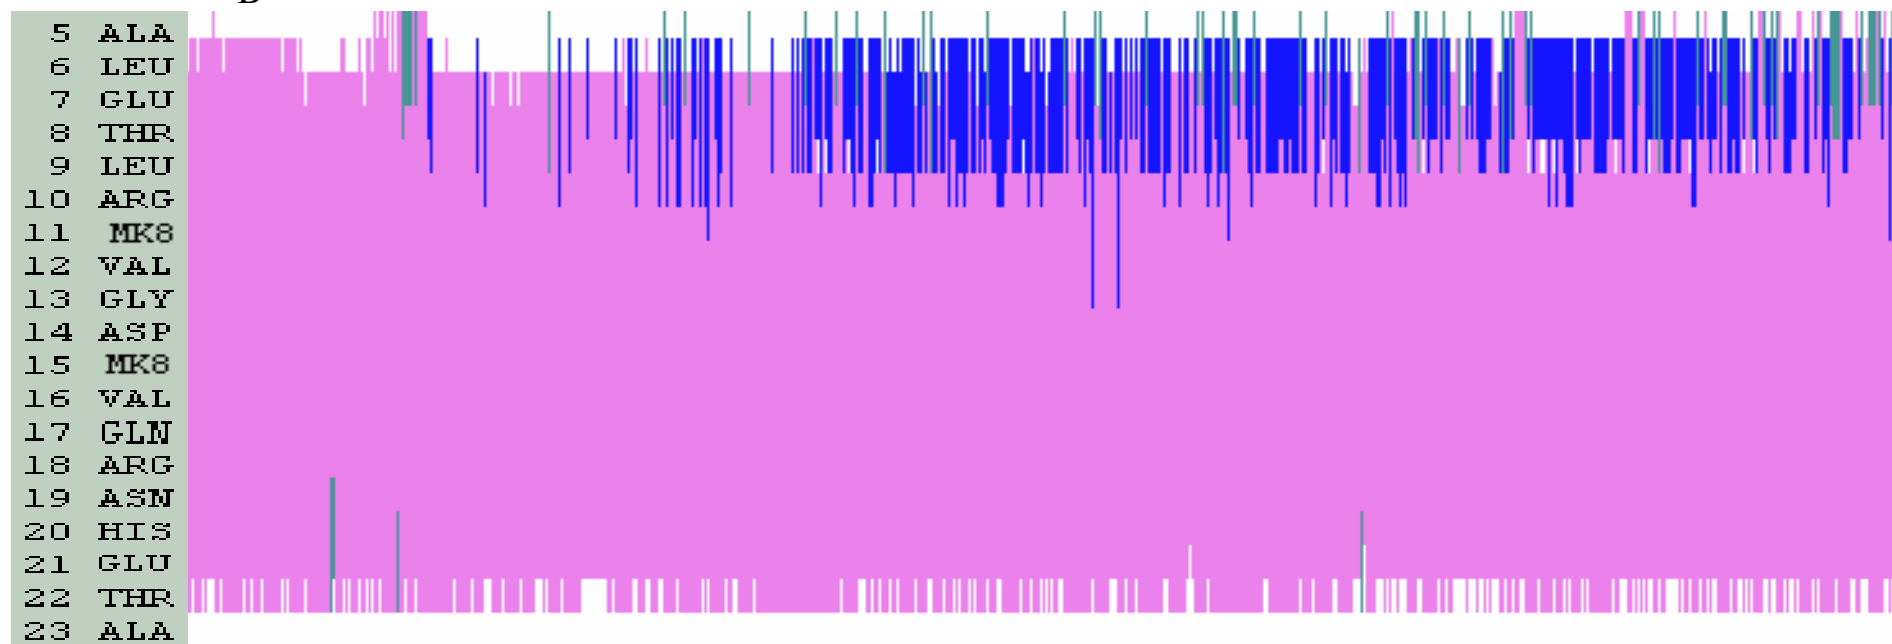

C

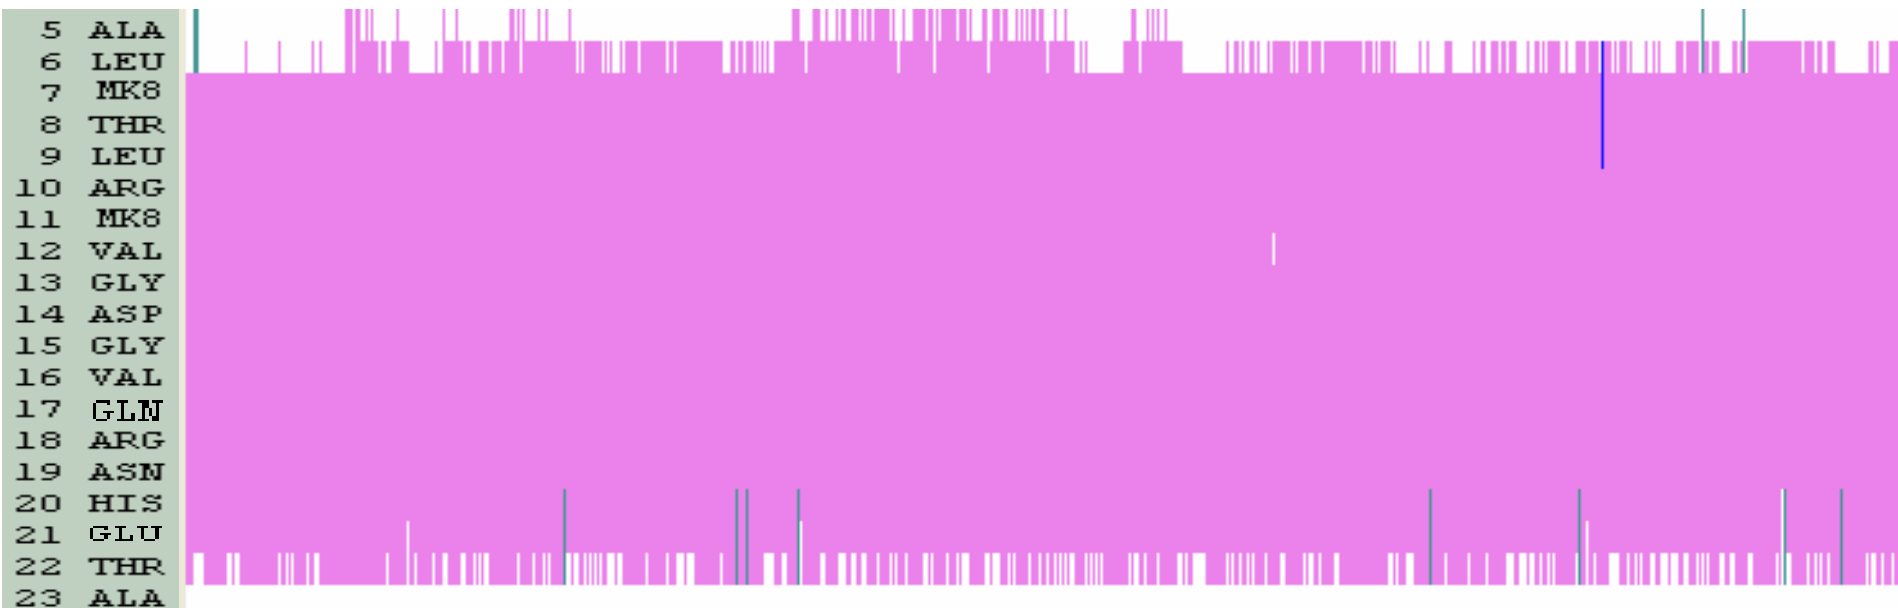

D

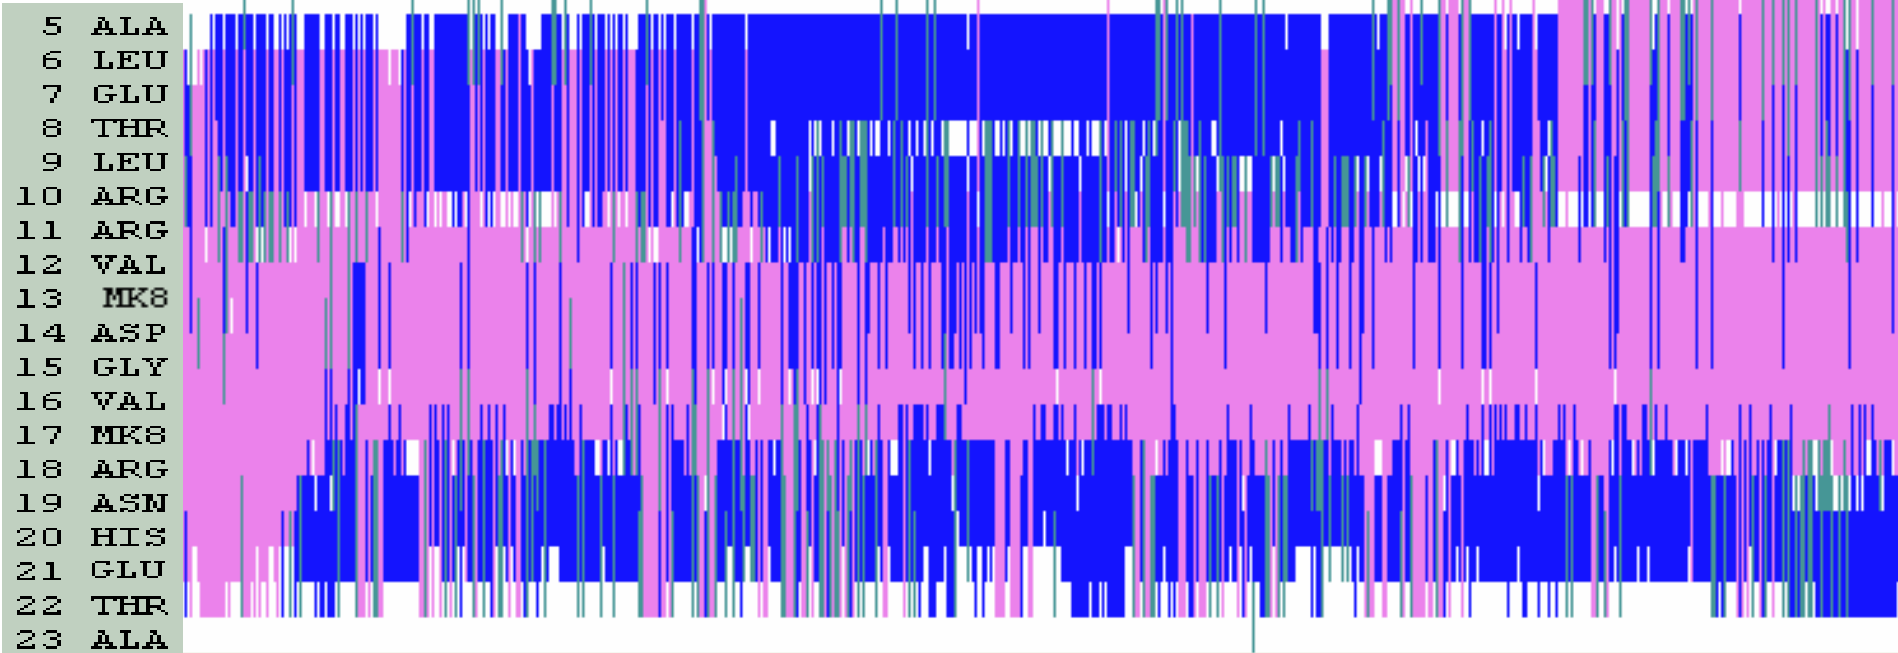

E

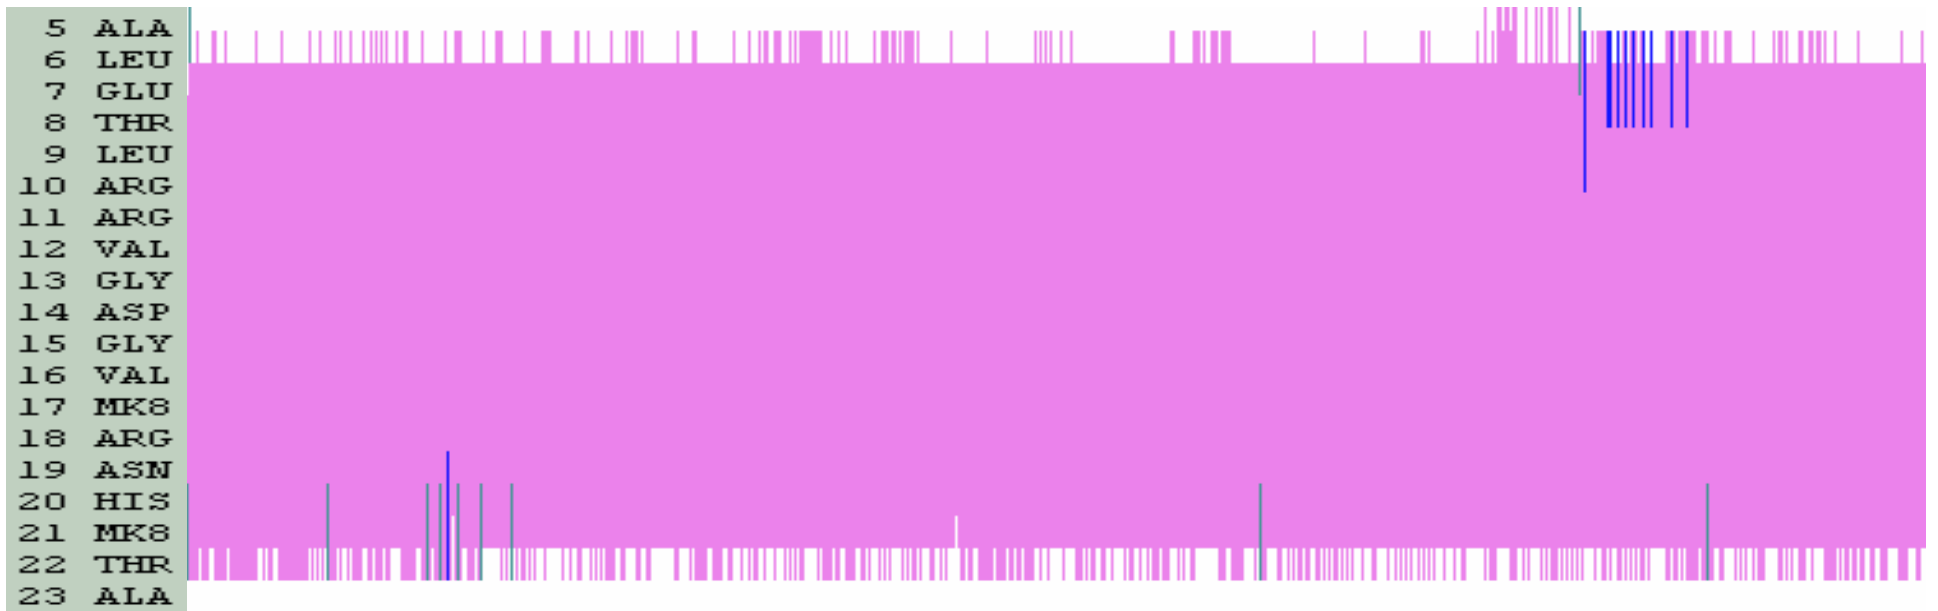

F

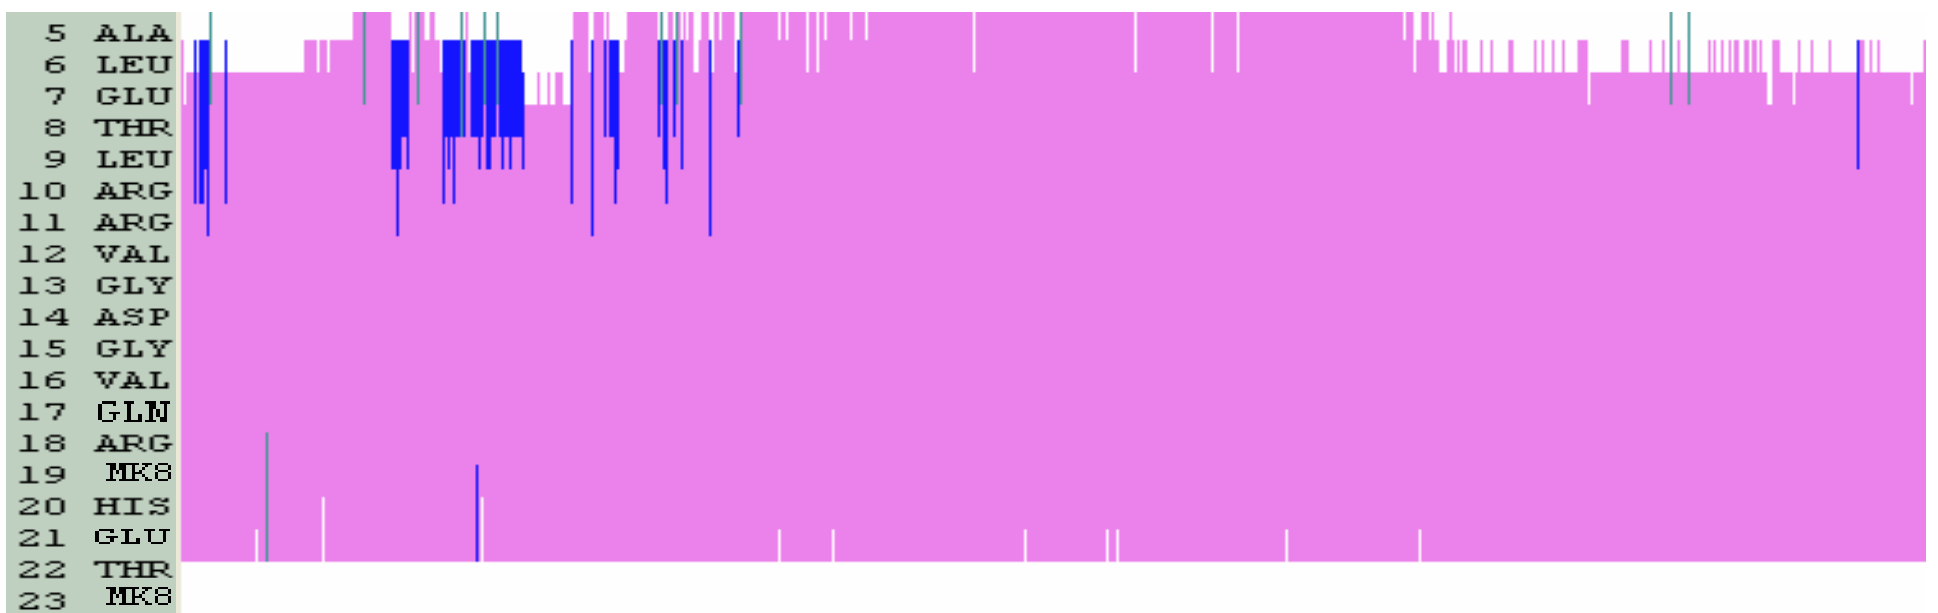

G

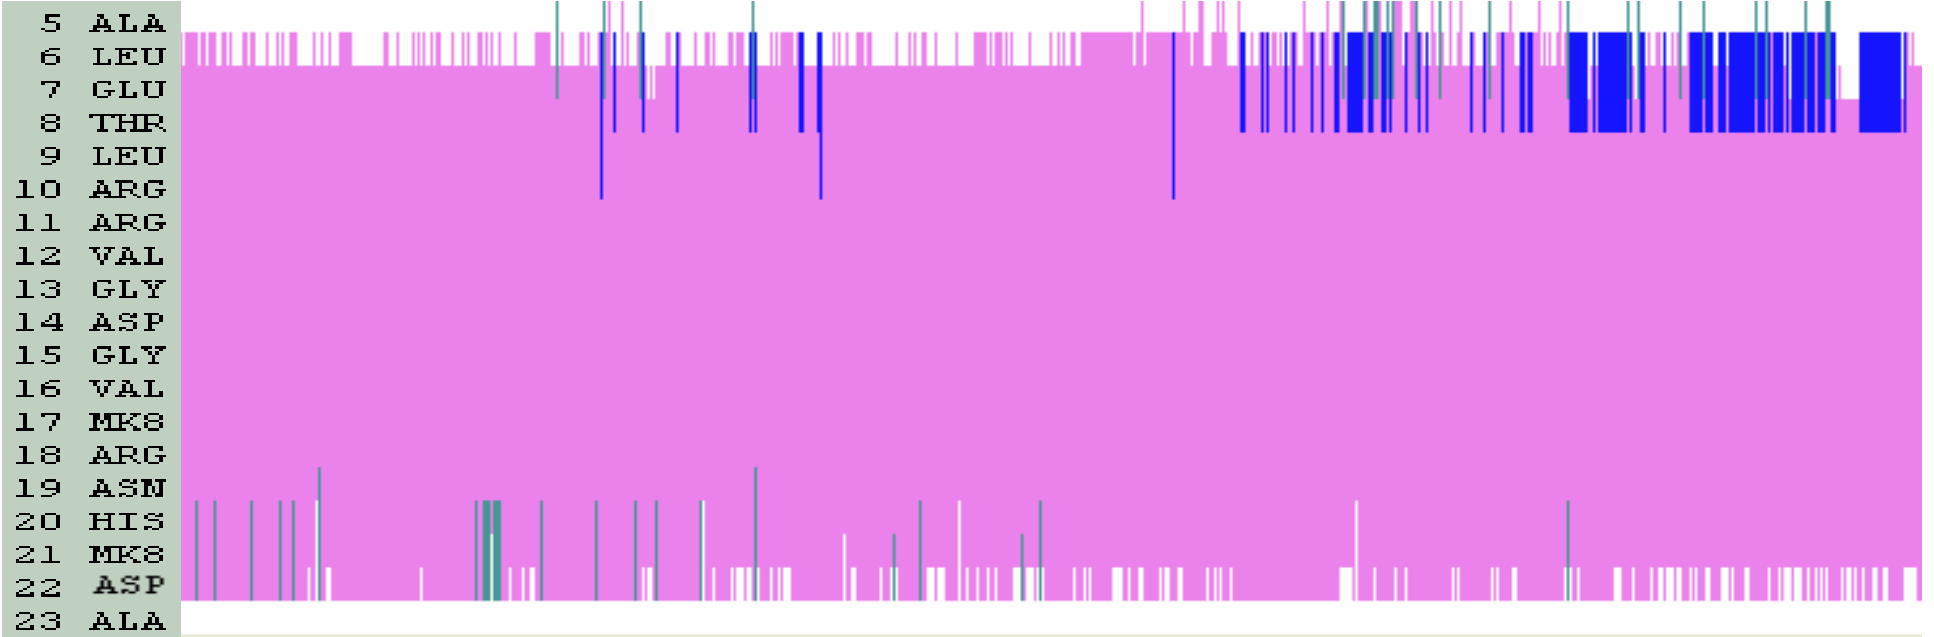

H

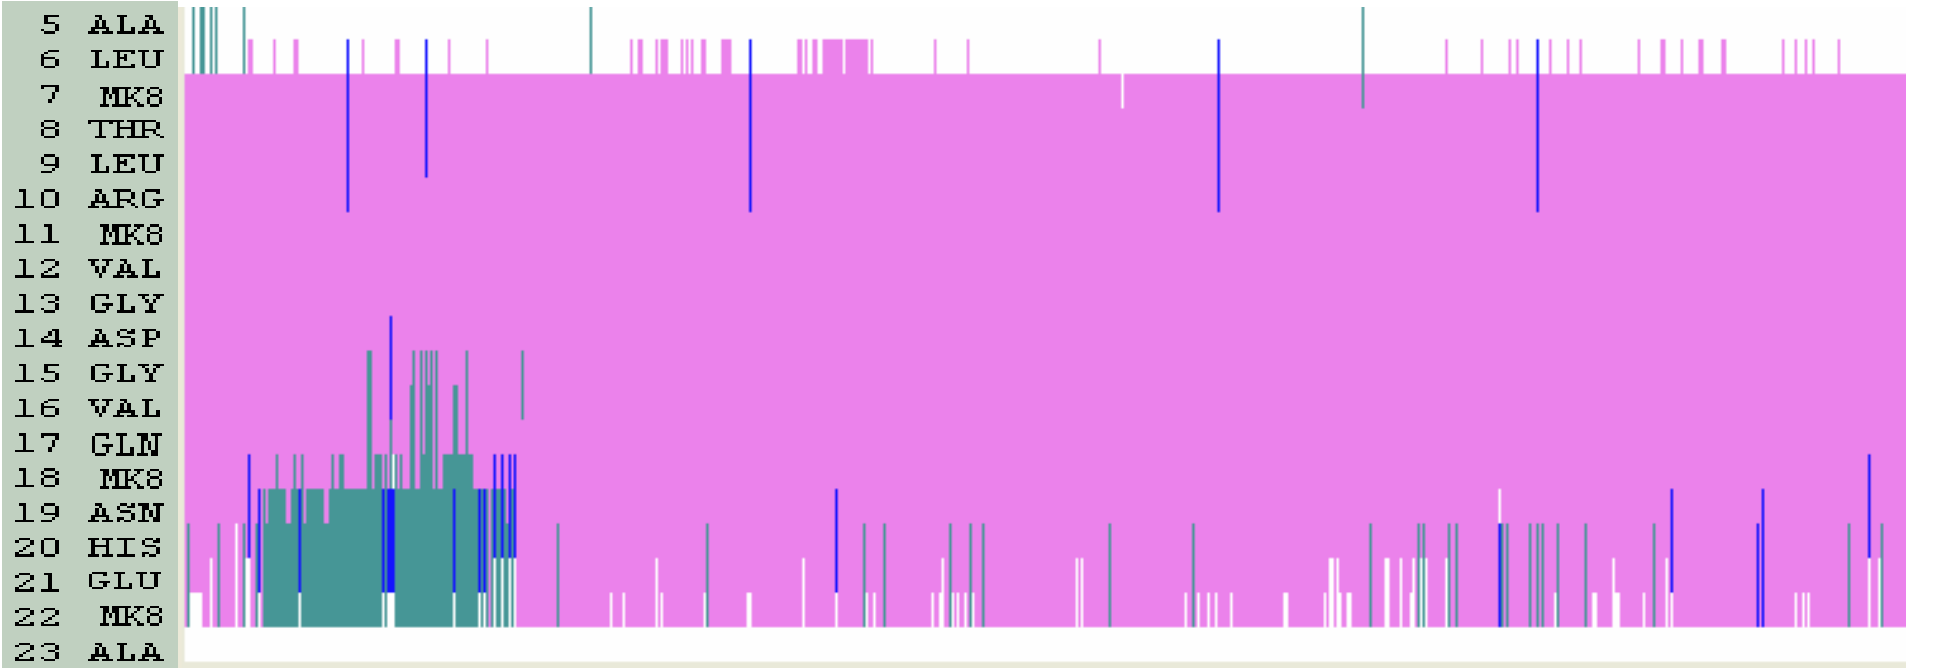

I

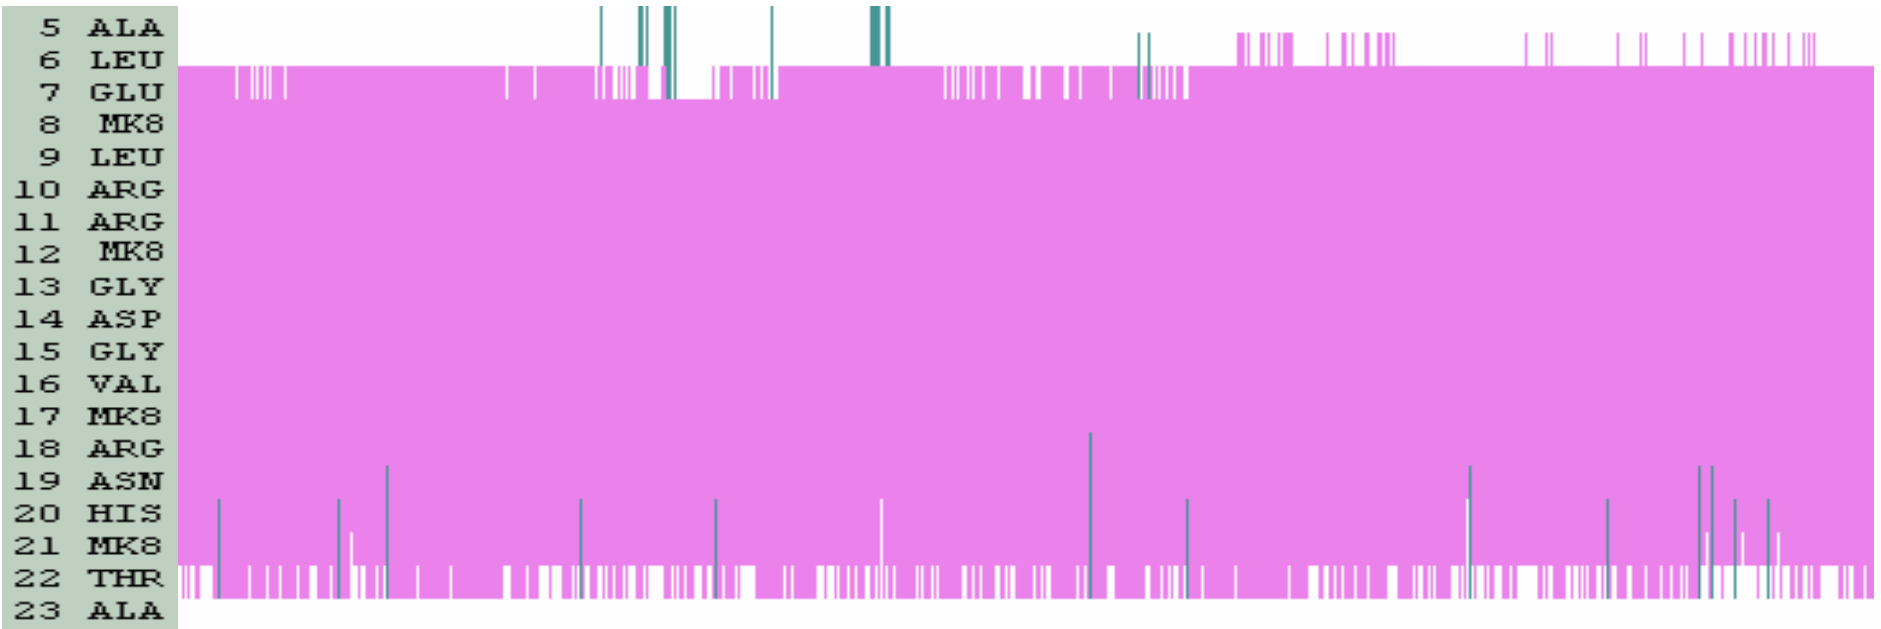

J

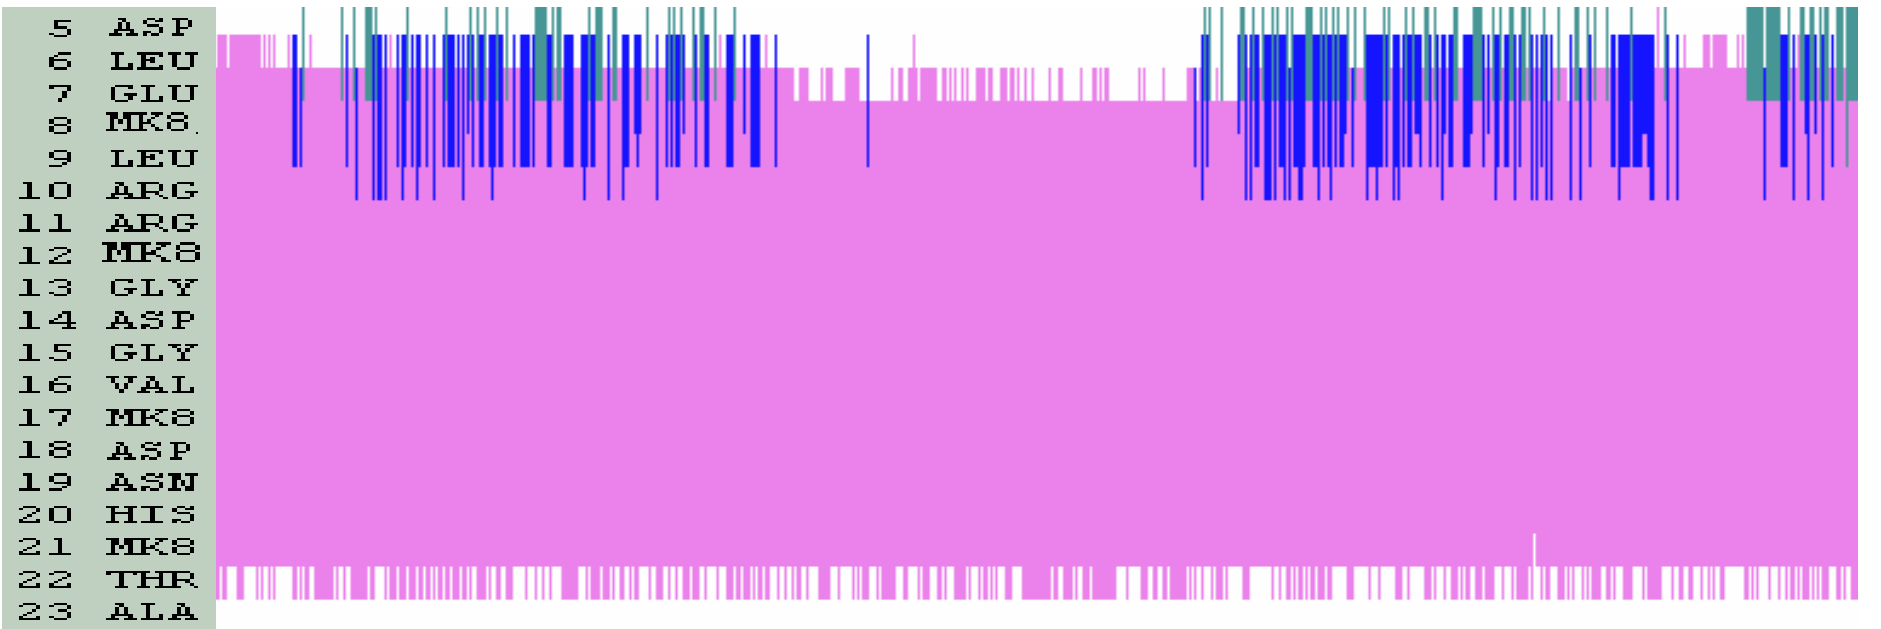

K

5 ASP  
6 LEU  
7 GLU  
8 MKS  
9 LEU  
10 ARG  
11 ARG  
12 MKS  
13 GLY  
14 ASP  
15 GLY  
16 VAL  
17 MKS  
18 ARG  
19 ASN  
20 HIS  
21 MKS  
22 THR  
23 ALA

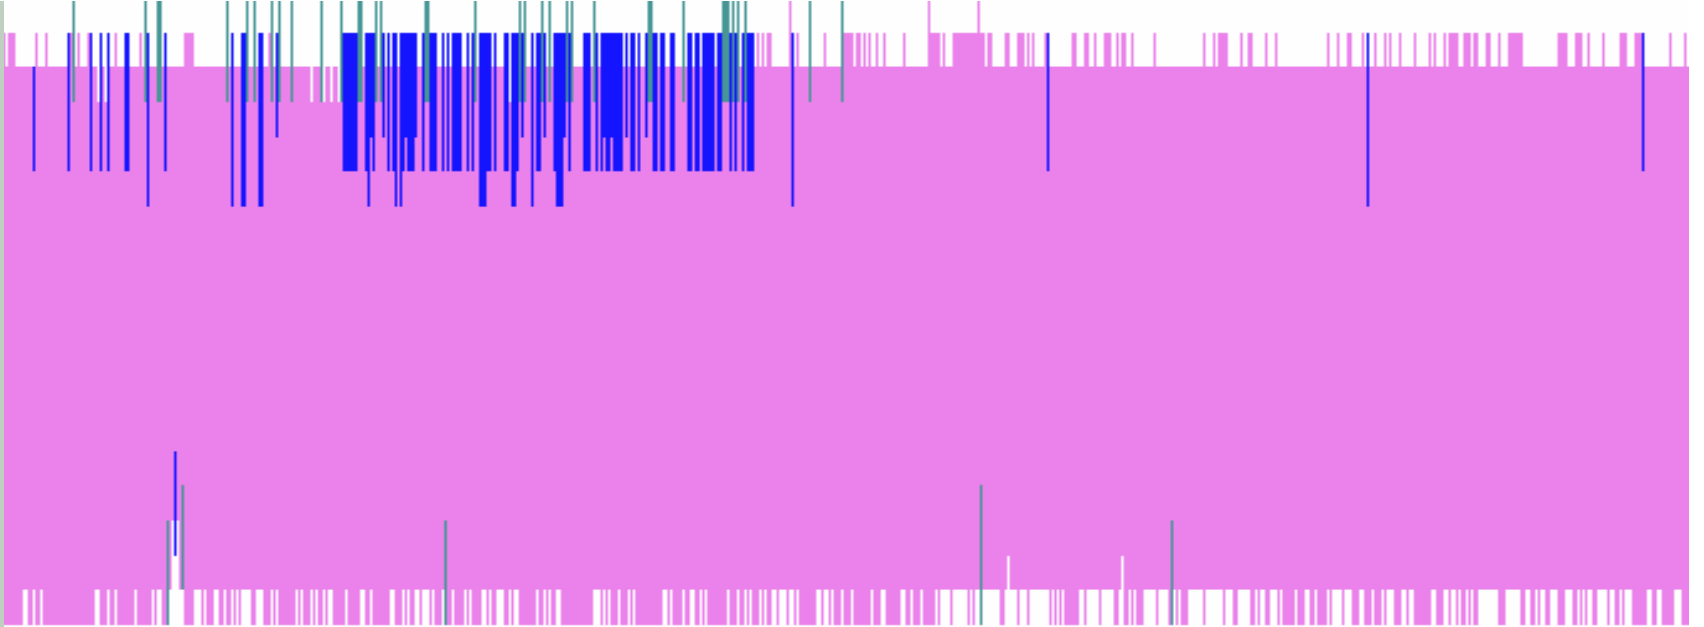

L

5 ALA  
6 LEU  
7 GLU  
8 MKS  
9 LEU  
10 ARG  
11 ARG  
12 MKS  
13 GLY  
14 ASP  
15 GLY  
16 VAL  
17 GLN  
18 ARG  
19 ASN  
20 HIS  
21 GLU  
22 THR  
23 ALA

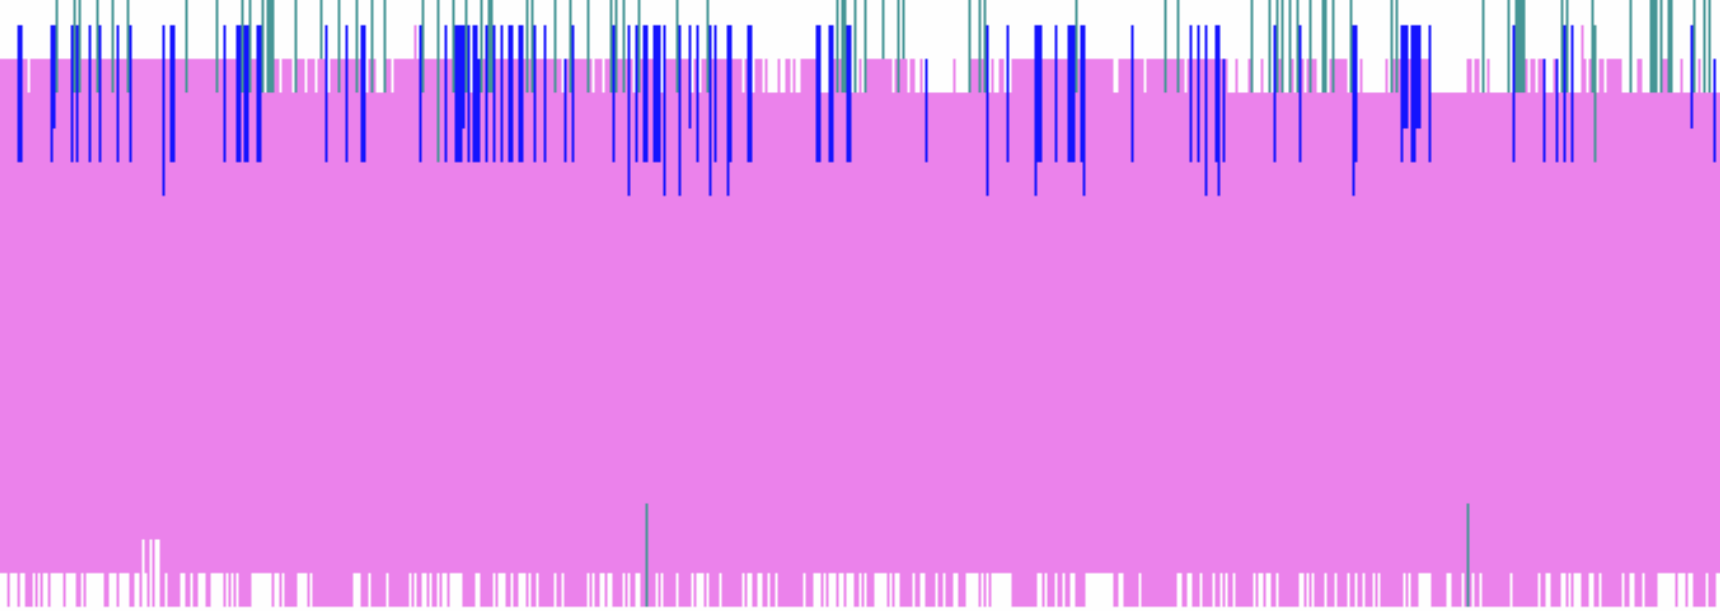

Supplement: pone.0043985.s011.pdf [file pone.0043985.s011.pdf]
