# Supplementary material for: Stapled BH3 Peptides against MCL-1: Mechanism and Design Using Atomistic Simulations
Source: PubMed Central journal article supplement (PMC3432064; doi:10.1371/journal.pone.0043985), 2012-08-31

Figure S14

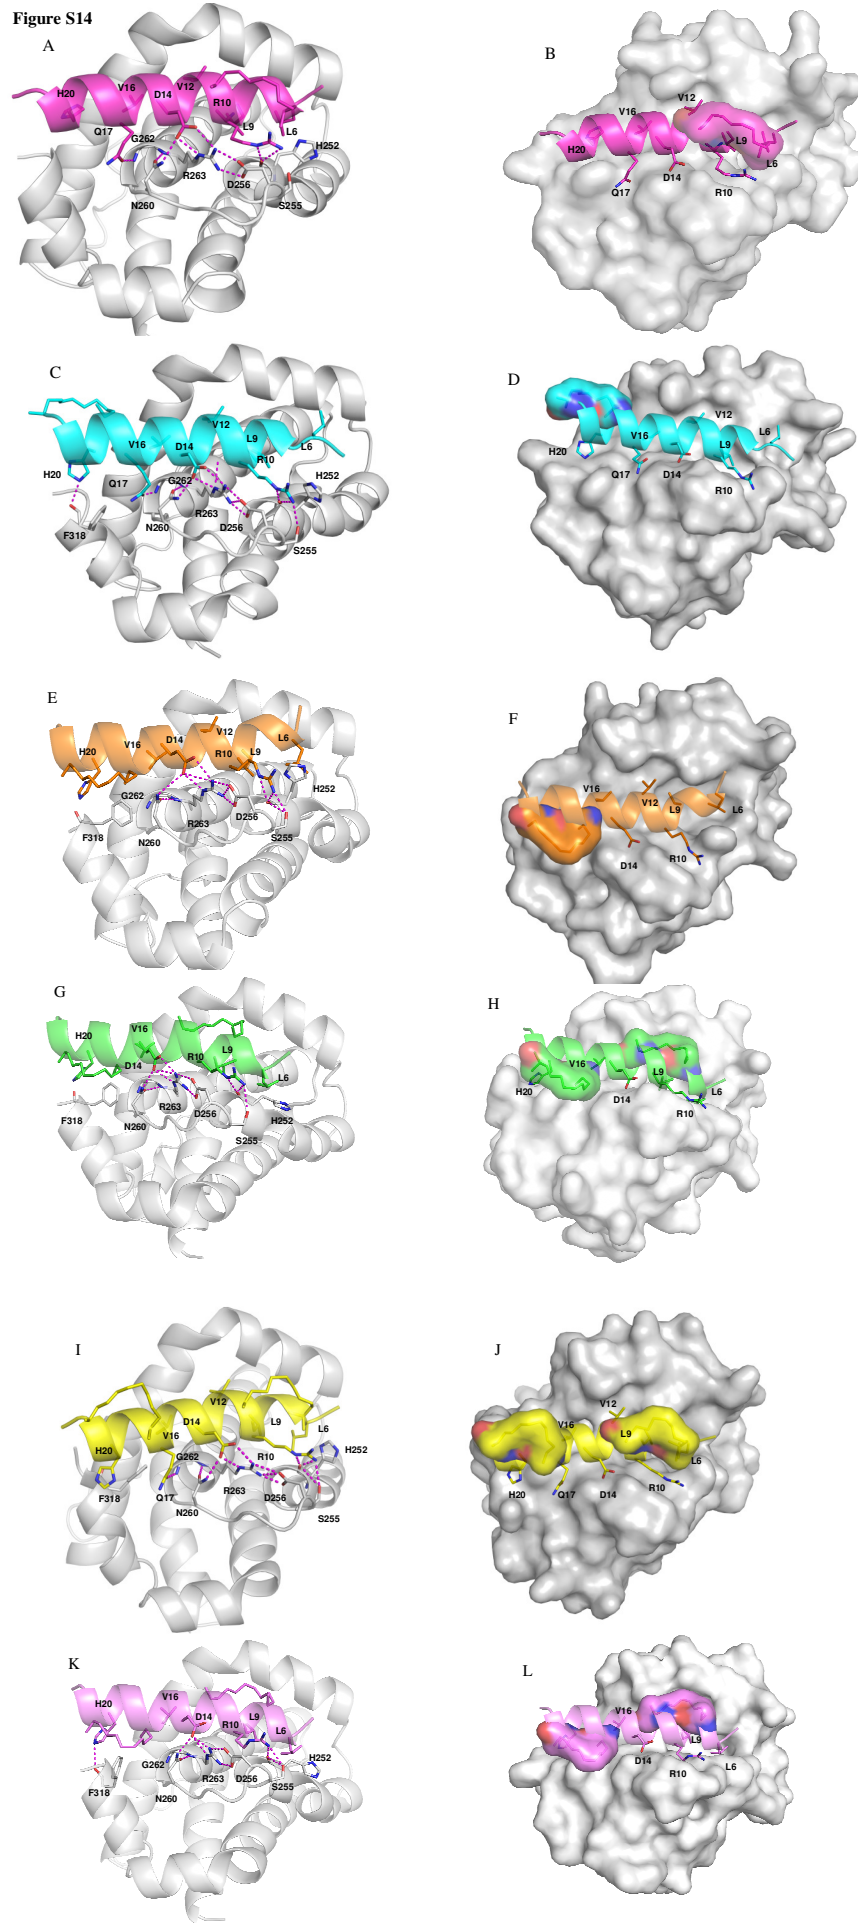

Supplement: pone.0043985.s014.pdf [file pone.0043985.s014.pdf]
