# Supplementary material for: Stapled BH3 Peptides against MCL-1: Mechanism and Design Using Atomistic Simulations
Source: PubMed Central journal article supplement (PMC3432064; doi:10.1371/journal.pone.0043985), 2012-08-31
Supplement: pone.0043985.s015.pdf [file pone.0043985.s015.pdf]

**Table S1**

|    | <b>BH3A (R11 and G15 are stapled)</b> | <b><math>\Delta H</math></b> | <b><math>\Delta</math></b> |
|----|---------------------------------------|------------------------------|----------------------------|
| 1  | BH3A                                  | -78.1                        | 0.0                        |
| 2  | A05E                                  | -74.0                        | -4.1                       |
| 3  | L06A                                  | -73.4                        | -4.7                       |
| 4  | E07A                                  | -74.2                        | -4.0                       |
| 5  | T08A                                  | -77.7                        | -0.4                       |
| 6  | L09A                                  | -71.5                        | -6.6                       |
| 7  | R10A                                  | -65.8                        | -12.3                      |
| 8  | V12A                                  | -76.2                        | -1.9                       |
| 9  | G13A                                  | -73.7                        | -4.4                       |
| 10 | D14A                                  | -58.0                        | -20.1                      |
| 11 | V16A                                  | -74.4                        | -3.7                       |
| 12 | Q17A                                  | -76.4                        | -1.7                       |
| 13 | R18A                                  | -78.2                        | 0.0                        |
| 14 | N19A                                  | -78.6                        | 0.4                        |
| 15 | H20A                                  | -74.0                        | -4.1                       |
| 16 | E21A                                  | -77.3                        | -0.8                       |
| 17 | T22A                                  | -77.5                        | -0.7                       |
| 18 | A23E                                  | -77.8                        | -0.4                       |
