# Supplementary material for: Stapled BH3 Peptides against MCL-1: Mechanism and Design Using Atomistic Simulations
Source: PubMed Central journal article supplement (PMC3432064; doi:10.1371/journal.pone.0043985), 2012-08-31
Supplement: pone.0043985.s016.pdf [file pone.0043985.s016.pdf]

Table S2

|                   | <b>MCL-1-BH3-wt</b> |      | <b>MCL-1</b> |      | <b>BH3-wt</b> |      | <b>Delta</b> |      |
|-------------------|---------------------|------|--------------|------|---------------|------|--------------|------|
|                   | Mean                | Std  | Mean         | Std  | Mean          | Std  | Mean         | Std  |
| ELE               | -6719.5             | 70.0 | -5649.8      | 64.6 | -941.8        | 24.6 | -127.9       | 17.1 |
| VDW               | -742.3              | 22.9 | -622.3       | 20.2 | -30.6         | 6.5  | -89.3        | 5.6  |
| GAS               | -4586.1             | 78.0 | -3716.0      | 72.1 | -652.7        | 26.6 | -217.3       | 18.1 |
| GBSOL             | -2251.5             | 62.8 | -1928.9      | 59.0 | -472.5        | 22.1 | 149.9        | 16.0 |
| GBTOT             | -6837.6             | 39.2 | -5644.9      | 36.9 | -1125.2       | 12.7 | <b>-67.4</b> | 5.3  |
| TSTOT             | 1960.4              | 4.7  | 1749.3       | 5.8  | 251.2         | 1.6  | <b>-40.1</b> | 5.6  |
| $\Delta G_{bind}$ |                     |      |              |      |               |      | <b>-27.3</b> |      |

|                   | <b>MCL-1- BH3A</b> |      | <b>MCL-1</b> |      | <b>BH3A</b> |      | <b>Delta</b> |      |
|-------------------|--------------------|------|--------------|------|-------------|------|--------------|------|
|                   | Mean               | Std  | Mean         | Std  | Mean        | Std  | Mean         | Std  |
| ELE               | -6710.5            | 73.3 | -5740.5      | 64.7 | -807.6      | 51.1 | -162.5       | 29.6 |
| VDW               | -763.4             | 22.0 | -640.3       | 19.3 | -28.0       | 6.5  | -95.1        | 6.1  |
| GAS               | -4597.3            | 78.3 | -3838.0      | 69.0 | -501.7      | 49.4 | -257.6       | 27.3 |
| GBSOL             | -2048.7            | 65.8 | -1841.3      | 55.2 | -398.2      | 45.4 | 190.8        | 23.5 |
| GBTOT             | -6645.9            | 39.1 | -5679.3      | 37.3 | -899.9      | 13.1 | <b>-66.8</b> | 6.2  |
| TSTOT             | 1951.1             | 5.7  | 1739.0       | 6.6  | 250.9       | 1.9  | <b>-38.8</b> | 5.4  |
| $\Delta G_{bind}$ |                    |      |              |      |             |      | <b>-27.9</b> |      |

|                   | <b>MCL-1- BH3B</b> |      | <b>MCL-1</b> |      | <b>BH3B</b> |      | <b>Delta</b> |      |
|-------------------|--------------------|------|--------------|------|-------------|------|--------------|------|
|                   | Mean               | Std  | Mean         | Std  | Mean        | Std  | Mean         | Std  |
| ELE               | -6524.3            | 78.1 | -5771.5      | 68.1 | -672.1      | 21.9 | -80.6        | 28.3 |
| VDW               | -742.3             | 21.1 | -620.4       | 19.5 | -30.3       | 6.0  | -91.6        | 4.9  |
| GAS               | -4393.4            | 82.5 | -3841.7      | 73.2 | -379.5      | 24.5 | -172.2       | 28.2 |
| GBSOL             | -2185.7            | 69.6 | -1834.5      | 60.2 | -460.8      | 19.7 | 109.7        | 22.4 |
| GBTOT             | -6579.0            | 37.7 | -5676.2      | 35.7 | -840.3      | 12.1 | <b>-62.5</b> | 8.3  |
| TSTOT             | 1952.4             | 5.8  | 1744.0       | 5.4  | 245.3       | 1.8  | <b>-36.9</b> | 5.3  |
| $\Delta G_{bind}$ |                    |      |              |      |             |      | <b>-25.6</b> |      |

|                   | <b>MCL-1- BH3C</b> |      | <b>MCL-1</b> |      | <b>BH3C</b> |      | <b>Delta</b> |      |
|-------------------|--------------------|------|--------------|------|-------------|------|--------------|------|
|                   | Mean               | Std  | Mean         | Std  | Mean        | Std  | Mean         | Std  |
| ELE               | -6676.7            | 72.4 | -5754.1      | 67.4 | -887.3      | 26.0 | -35.4        | 20.7 |
| VDW               | -729.4             | 20.9 | -619.3       | 19.5 | -18.6       | 7.0  | -91.4        | 5.7  |
| GAS               | -4523.4            | 77.9 | -3817.7      | 72.7 | -578.9      | 27.3 | -126.8       | 22.7 |
| GBSOL             | -2203.6            | 63.3 | -1844.8      | 58.1 | -432.7      | 22.9 | 73.9         | 20.1 |
| GBTOT             | -6726.9            | 40.1 | -5662.5      | 37.6 | -1011.5     | 13.0 | <b>-52.9</b> | 5.2  |
| TSTOT             | 1962.3             | 6.6  | 1748.8       | 5.6  | 255.1       | 1.9  | <b>-41.6</b> | 6.3  |
| $\Delta G_{bind}$ |                    |      |              |      |             |      | <b>-11.2</b> |      |

|                   | <b>MCL-1- BH3D</b> |      | <b>MCL-1</b> |      | <b>BH3D</b> |      | <b>Delta</b> |      |
|-------------------|--------------------|------|--------------|------|-------------|------|--------------|------|
|                   | Mean               | Std  | Mean         | Std  | Mean        | Std  | Mean         | Std  |
| ELE               | -6631.5            | 75.9 | -5768.8      | 73.2 | -818.2      | 14.2 | -44.5        | 15.0 |
| VDW               | -755.5             | 20.5 | -637.7       | 19.3 | -32.2       | 6.3  | -85.6        | 5.1  |
| GAS               | -4515.3            | 82.9 | -3858.6      | 80.3 | -526.6      | 16.6 | -130.1       | 15.7 |
| GBSOL             | -2178.5            | 65.1 | -1814.9      | 62.6 | -430.5      | 11.4 | 66.9         | 14.0 |
| GBTOT             | -6693.8            | 39.5 | -5673.5      | 37.7 | -957.1      | 11.8 | <b>-63.2</b> | 4.7  |
| TSTOT             | 1956.3             | 5.7  | 1744.3       | 4.5  | 248.9       | 1.3  | <b>-36.9</b> | 4.6  |
| $\Delta G_{bind}$ |                    |      |              |      |             |      | <b>-26.3</b> |      |

|                   | <b>MCL-1- BH3E</b> |      | <b>MCL-1</b> |      | <b>BH3E</b> |      | <b>Delta</b> |      |
|-------------------|--------------------|------|--------------|------|-------------|------|--------------|------|
|                   | Mean               | Std  | Mean         | Std  | Mean        | Std  | Mean         | Std  |
| ELE               | -6716.6            | 89.9 | -5725.3      | 78.5 | -931.5      | 42.8 | -59.8        | 14.3 |
| VDW               | -755.7             | 20.0 | -629.6       | 18.4 | -32.5       | 6.7  | -93.6        | 4.5  |
| GAS               | -4583.3            | 92.5 | -3804.9      | 83.0 | -625.0      | 43.3 | -153.4       | 14.9 |
| GBSOL             | -2099.8            | 76.7 | -1867.5      | 68.7 | -317.5      | 39.1 | 85.3         | 13.4 |
| GBTOT             | -6683.1            | 39.3 | -5672.4      | 37.4 | -942.5      | 12.9 | <b>-68.1</b> | 4.6  |
| TSTOT             | 1956.5             | 4.9  | 1745.4       | 5.8  | 252.4       | 1.7  | <b>-41.3</b> | 4.4  |
| $\Delta G_{bind}$ |                    |      |              |      |             |      | <b>-26.8</b> |      |

|                   | <b>MCL-1- BH3F</b> |      | <b>MCL-1</b> |      | <b>BH3F</b> |      | <b>Delta</b> |      |
|-------------------|--------------------|------|--------------|------|-------------|------|--------------|------|
|                   | Mean               | Std  | Mean         | Std  | Mean        | Std  | Mean         | Std  |
| ELE               | -6572.1            | 67.9 | -5688.1      | 62.0 | -796.0      | 26.5 | -88.0        | 15.6 |
| VDW               | -750.2             | 20.9 | -632.9       | 20.0 | -29.9       | 5.8  | -87.4        | 5.2  |
| GAS               | -4450.7            | 75.0 | -3776.7      | 68.1 | -498.7      | 27.7 | -175.3       | 16.7 |
| GBSOL             | -2269.4            | 59.8 | -1890.4      | 53.4 | -489.8      | 25.1 | 110.8        | 14.5 |
| GBTOT             | -6720.1            | 38.3 | -5667.1      | 36.2 | -988.5      | 12.4 | <b>-64.6</b> | 4.9  |
| TSTOT             | 1957.2             | 5.6  | 1744.3       | 5.8  | 251.3       | 1.4  | <b>-38.4</b> | 5.4  |
| $\Delta G_{bind}$ |                    |      |              |      |             |      | <b>-26.1</b> |      |

|                   | <b>MCL-1- BH3G</b> |      | <b>MCL-1</b> |      | <b>BH3G</b> |      | <b>Delta</b> |      |
|-------------------|--------------------|------|--------------|------|-------------|------|--------------|------|
|                   | Mean               | Std  | Mean         | Std  | Mean        | Std  | Mean         | Std  |
| ELE               | -6410.2            | 75.7 | -5831.2      | 67.3 | -393.0      | 13.0 | -186.0       | 22.9 |
| VDW               | -749.7             | 20.2 | -630.5       | 19.3 | -27.7       | 5.9  | -91.5        | 5.0  |
| GAS               | -4292.5            | 82.5 | -3919.0      | 73.5 | -96.0       | 17.6 | -277.5       | 24.1 |
| GBSOL             | -2054.8            | 66.3 | -1768.1      | 58.5 | -496.0      | 11.0 | 209.3        | 21.7 |
| GBTOT             | -6347.3            | 38.2 | -5687.2      | 36.2 | -592.0      | 12.4 | <b>-68.2</b> | 5.4  |
| TSTOT             | 1945.3             | 3.8  | 1742.3       | 4.5  | 244.7       | 1.1  | <b>-41.7</b> | 4.2  |
| $\Delta G_{bind}$ |                    |      |              |      |             |      | <b>-26.4</b> |      |

|                   | <b>MCL-1- BH3H</b> |      | <b>MCL-1</b> |      | <b>BH3H</b> |      | <b>Delta</b> |      |
|-------------------|--------------------|------|--------------|------|-------------|------|--------------|------|
|                   | Mean               | Std  | Mean         | Std  | Mean        | Std  | Mean         | Std  |
| ELE               | -6447.0            | 75.4 | -5651.0      | 71.5 | -758.3      | 25.1 | -37.7        | 19.4 |
| VDW               | -739.8             | 22.0 | -624.0       | 20.2 | -29.2       | 6.3  | -86.6        | 4.4  |
| GAS               | -4295.9            | 80.6 | -3725.5      | 74.4 | -446.1      | 28.7 | -124.4       | 19.4 |
| GBSOL             | -2292.9            | 63.3 | -1933.7      | 62.8 | -414.9      | 23.3 | 55.7         | 17.9 |
| GBTOT             | -6588.8            | 41.4 | -5659.2      | 37.8 | -860.9      | 13.3 | <b>-68.7</b> | 4.7  |
| TSTOT             | 1962.2             | 5.5  | 1743.5       | 5.5  | 254.1       | 3.1  | <b>-35.4</b> | 5.1  |
| $\Delta G_{bind}$ |                    |      |              |      |             |      | <b>-33.4</b> |      |

|                   | <b>MCL-1- BH3I</b> |      | <b>MCL-1</b> |      | <b>BH3I</b> |      | <b>Delta</b> |      |
|-------------------|--------------------|------|--------------|------|-------------|------|--------------|------|
|                   | Mean               | Std  | Mean         | Std  | Mean        | Std  | Mean         | Std  |
| ELE               | -6711.9            | 73.9 | -5736.1      | 63.2 | -851.1      | 19.7 | -124.6       | 32.4 |
| VDW               | -754.9             | 22.7 | -632.1       | 20.8 | -30.7       | 6.6  | -92.1        | 5.3  |
| GAS               | -4584.2            | 85.0 | -3828.8      | 72.8 | -538.8      | 21.1 | -216.7       | 32.6 |
| GBSOL             | -2092.4            | 68.6 | -1847.1      | 56.2 | -390.3      | 16.9 | 145.0        | 30.6 |
| GBTOT             | -6676.6            | 38.8 | -5675.9      | 37.2 | -929.1      | 12.4 | <b>-71.7</b> | 5.9  |
| TSTOT             | 1964.0             | 5.4  | 1743.9       | 5.2  | 258.4       | 2.1  | <b>-38.3</b> | 5.6  |
| $\Delta G_{bind}$ |                    |      |              |      |             |      | <b>-33.5</b> |      |

|                          | <b>MCL-1- BH3J</b> |      | <b>MCL-1</b> |      | <b>BH3J</b> |      | <b>Delta</b> |      |
|--------------------------|--------------------|------|--------------|------|-------------|------|--------------|------|
|                          | Mean               | Std  | Mean         | Std  | Mean        | Std  | Mean         | Std  |
| ELE                      | -6569.6            | 72.1 | -5688.1      | 67.7 | -637.0      | 15.8 | -244.5       | 26.4 |
| VDW                      | -749.8             | 20.5 | -629.2       | 19.2 | -30.0       | 6.1  | -90.7        | 5.1  |
| GAS                      | -4438.9            | 78.0 | -3767.6      | 74.6 | -336.2      | 18.8 | -335.1       | 25.3 |
| GBSOL                    | -2120.4            | 62.9 | -1904.9      | 57.9 | -480.4      | 13.4 | 264.9        | 24.1 |
| GBTOT                    | -6559.3            | 38.9 | -5672.5      | 36.7 | -816.6      | 13.0 | <b>-70.3</b> | 4.5  |
| TSTOT                    | 1956.1             | 5.1  | 1744.2       | 5.2  | 250.5       | 1.6  | <b>-38.5</b> | 4.5  |
| $\Delta G_{\text{bind}}$ |                    |      |              |      |             |      | <b>-31.7</b> |      |

|                          | <b>MCL-1- BH3K</b> |      | <b>MCL-1</b> |      | <b>BH3K</b> |      | <b>Delta</b> |      |
|--------------------------|--------------------|------|--------------|------|-------------|------|--------------|------|
|                          | Mean               | Std  | Mean         | Std  | Mean        | Std  | Mean         | Std  |
| ELE                      | -6768.9            | 80.8 | -5780.1      | 69.5 | -858.2      | 35.1 | -130.6       | 18.9 |
| VDW                      | -750.6             | 21.9 | -625.0       | 19.9 | -32.2       | 6.5  | -93.5        | 5.2  |
| GAS                      | -4643.2            | 83.4 | -3862.1      | 71.4 | -557.0      | 36.8 | -224.1       | 20.0 |
| GBSOL                    | -2143.1            | 68.5 | -1815.7      | 58.0 | -478.7      | 31.9 | 151.4        | 18.3 |
| GBTOT                    | -6786.3            | 38.4 | -5677.8      | 35.4 | -1035.7     | 12.7 | <b>-72.7</b> | 4.7  |
| TSTOT                    | 1959.1             | 6.1  | 1743.6       | 5.7  | 254.6       | 2.7  | <b>-39.0</b> | 5.3  |
| $\Delta G_{\text{bind}}$ |                    |      |              |      |             |      | <b>-33.7</b> |      |
