# Supplementary material for: Stapled BH3 Peptides against MCL-1: Mechanism and Design Using Atomistic Simulations
Source: PubMed Central journal article supplement (PMC3432064; doi:10.1371/journal.pone.0043985), 2012-08-31
Supplement: pone.0043985.s017.pdf [file pone.0043985.s017.pdf]

**Table S3**

| Residues | BH3-wt | BH3A | BH3B | BH3C | BH3D | BH3E | BH3F | BH3G | BH3H | BH3I | BH3J | BH3K |
|----------|--------|------|------|------|------|------|------|------|------|------|------|------|
| A5       | 5.3    | 6.5  | 6.6  | 4.5  | 5.1  | 5.7  | 4.8  | 6.7  | 3.7  | 6.3  | 5.0  | 5.9  |
| L6       | -5.5   | -5.5 | -5.7 | -5.5 | -4.7 | -5.3 | -5.1 | -5.3 | -3.8 | -5.9 | -5.3 | -5.5 |
| E7       | -0.7   | -1.6 | 0.0  | -1.2 | -0.7 | -1.0 | -0.8 | 0.0  | -0.7 | -1.3 | -1.3 | -0.8 |
| T8       | -0.4   | 0.2  | -0.7 | 0.3  | -0.6 | -0.9 | -0.2 | -0.6 | 0.0  | 0.0  | 0.0  | 0.0  |
| L9       | -4.9   | -5.0 | -5.1 | -4.0 | -4.8 | -5.0 | -4.5 | -4.8 | -4.5 | -4.5 | -4.5 | -4.5 |
| R10      | -5.4   | -5.3 | -4.3 | -3.6 | -5.3 | -4.5 | -5.3 | -5.1 | -5.9 | -5.2 | -4.6 | -5.8 |
| R11      | 0.6    | 0.0  | -2.9 | 0.5  | 0.6  | 0.7  | 0.3  | -3.1 | 0.4  | 0.5  | 0.5  | 0.5  |
| V12      | -3.2   | -3.0 | -2.9 | -4.6 | -3.1 | -3.0 | -2.8 | -3.2 | -7.3 | -6.3 | -7.0 | -7.4 |
| G13      | -1.3   | -1.6 | -1.6 | 0.0  | -1.0 | -1.6 | -1.1 | -1.6 | -1.5 | -1.4 | -1.4 | -1.7 |
| D14      | -3.1   | -3.4 | -2.9 | -0.1 | -2.8 | -3.2 | -3.0 | -3.2 | -3.0 | -3.3 | -3.2 | -3.2 |
| G15      | 0.1    | -1.9 | 0.1  | 0.0  | 0.2  | 0.2  | 0.2  | 0.2  | 0.2  | 0.2  | 0.2  | 0.2  |
| V16      | -2.9   | -3.1 | -3.2 | -3.9 | -2.8 | -3.2 | -3.1 | -2.7 | -3.0 | -2.9 | -3.0 | -2.9 |
| Q17      | -1.7   | -2.2 | -2.2 | -6.0 | 0.0  | -2.3 | 0.0  | -1.9 | 0.0  | 0.0  | 0.0  | -2.0 |
| R18      | 0.5    | 0.8  | 0.3  | 0.5  | 0.3  | 0.3  | 0.4  | 0.0  | 0.4  | 0.4  | 0.1  | 0.3  |
| N19      | 0.6    | 0.5  | 0.5  | -0.4 | 0.5  | 0.0  | 0.5  | 0.4  | 0.5  | 0.5  | 0.5  | 0.5  |
| H20      | -1.6   | -0.8 | -1.2 | -1.3 | -1.8 | -1.3 | -2.2 | -1.6 | -1.3 | -1.9 | -2.0 | -2.0 |
| E21      | 0.4    | 0.1  | 0.3  | 0.4  | -4.3 | 0.1  | -4.6 | 0.5  | -4.5 | -4.2 | -4.3 | 0.3  |
| T22      | 0.1    | 0.1  | 0.1  | 0.1  | 0.1  | 0.2  | 0.2  | -0.4 | 0.1  | 0.1  | 0.1  | 0.1  |
| A23      | 0.4    | 0.5  | 0.5  | 0.3  | 0.3  | -1.0 | 0.4  | 0.1  | 0.4  | 0.4  | 0.4  | 0.4  |
