# Supplementary material for: Stapled BH3 Peptides against MCL-1: Mechanism and Design Using Atomistic Simulations
Source: PubMed Central journal article supplement (PMC3432064; doi:10.1371/journal.pone.0043985), 2012-08-31
Supplement: pone.0043985.s018.pdf [file pone.0043985.s018.pdf]

**Table S4**

|    | <b>BH3-wt</b> | <b><math>\Delta H</math></b> | <b><math>\Delta</math></b> |
|----|---------------|------------------------------|----------------------------|
| 1  | wt            | -75.0                        | 0.0                        |
| 2  | A05E          | -71.7                        | -3.4                       |
| 3  | L06A          | -71.3                        | -3.8                       |
| 4  | E07A          | -71.4                        | -3.6                       |
| 5  | T08A          | -73.7                        | -1.3                       |
| 6  | L09A          | -69.4                        | -5.7                       |
| 7  | R10A          | -63.8                        | -11.2                      |
| 8  | R11A          | -76.6                        | 1.6                        |
| 9  | V12A          | -72.9                        | -2.1                       |
| 10 | G13A          | -72.1                        | -2.9                       |
| 11 | D14A          | -55.7                        | -19.3                      |
| 12 | G15A          | -76.0                        | 1.0                        |
| 13 | V16A          | -71.9                        | -3.2                       |
| 14 | Q17A          | -73.9                        | -1.1                       |
| 15 | R18A          | -76.7                        | 1.7                        |
| 16 | N19A          | -75.5                        | 0.4                        |
| 17 | H20A          | -70.9                        | -4.1                       |
| 18 | E21A          | -75.4                        | 0.3                        |
| 19 | T22A          | -75.5                        | 0.4                        |
| 20 | A23E          | -75.5                        | 0.5                        |
